# Supplementary material
Source: PubMed Central journal article supplement (PMC4706174)
Supplement: NIHMS630501-supplement-6.pdf [file NIHMS630501-supplement-6.pdf]

|             |            |          |             |
|-------------|------------|----------|-------------|
| 221         | 239        | 251      | <b>Crkl</b> |
| GGPEPGPYAQP | SVNTPLPNLQ | NGPIYARV | IQKRV       |
| PNAYDKT     | ALALEV     | GELVKV   | TKINVS      |
| QWEGEC      | NGKRGH     | FFPF     |             |
| GGPEPGPYAQP | SVNTPLPNLQ | NGPIYARV | IQKRV       |
| PNAYDKT     | ALALEV     | GELVKV   | TKINVS      |
| QWEGEC      | NGKRGH     | FFPF     |             |
| GGPEPGPYAQP | SVNTPLPNLQ | NGPIYARV | IQKRV       |
| PNAYDKT     | ALALEV     | GDLVKV   | TKINVS      |
| QWEGEC      | NGKYGH     | FFPF     |             |
| GGPEPGPYAQP | SINTPLPNLQ | NGPFYARV | IQKRV       |
| PNAYDKT     | ALALEV     | GELVKV   | TKINMS      |
| QWEGEC      | NGKRGH     | FFPF     |             |
| GGAERFS     | SASTSSDN   | -IELQPR  | LPAAKAK     |
| TFDRV       | PNAYDPT    | QLRVKKG  | QTVLVTQ     |
| KMSNG       | MYKAEL     | DGQIG    | SVPH        |

|             |           |        |             |
|-------------|-----------|--------|-------------|
| 221         | 239       | 251    | <b>CrkL</b> |
| IPEPAHAYAQP | QTTTPLPTV | ASTPGA | AINPLP      |
| STQNGP      | VFAKA     | IQKRV  | VPCAYDKT    |
| ALALEV      | GDIVK     | VTRM   | NINGQW      |
| EGEVN       | GRKGL     | FPF    | THVKIF      |
| IPEPAHAYAQP | QTTTPLPTV | ASTPGA | AINPLP      |
| STQNGP      | VFAKA     | IQKRV  | VPCAYDKT    |
| ALALEV      | GDIVK     | VTRM   | NINGQW      |
| EGEVN       | GRKGL     | FPF    | THVKIF      |
| IPEPAHAYAQP | QTTTPLPAV | SGSPGA | AITPLP      |
| STQNGP      | VFAKA     | IQKRV  | VPCAYDKT    |
| ALALEV      | GDIVK     | VTRM   | NINGQW      |
| EGEVN       | GRKGL     | FPF    | THVKIF      |
| IPEPAHAYAQP | QTTSP     | LPTV   | SSTPG       |
| AVINPL      | PSTQ      | NGPV   | YAKA        |
| IQKRV       | VPCAYDKT  | ALALEV | GDIVK       |
| VTRM        | NINGQW    | EGEVN  | GRKGL       |
| FPF         | THVKI     | I      |             |
| IPEPAHAYAQP | QTPS      | PLP-   | ASSTP       |
| PAVINPL     | PSTQ      | NGPV   | YAKA        |
| IQKRV       | VPCAYDKT  | ALALEV | GDIVK       |
| VTRM        | NINGQW    | EGEVN  | GRKGL       |
| FPF         | THVKI     | I      |             |
