# Supplementary material
Source: PubMed Central journal article supplement (PMC4706174)

# S1A.

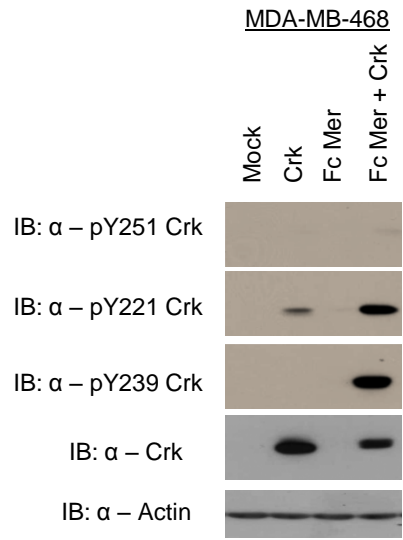

**S1B.**

**pY251**

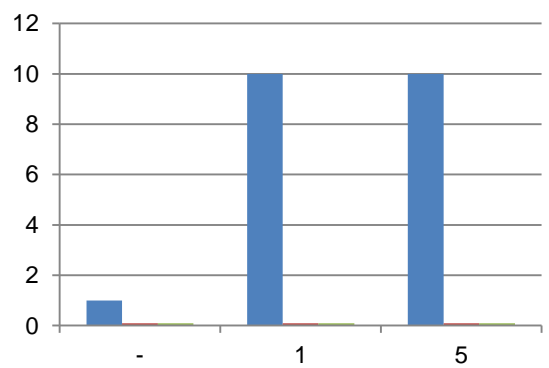

**pY251**

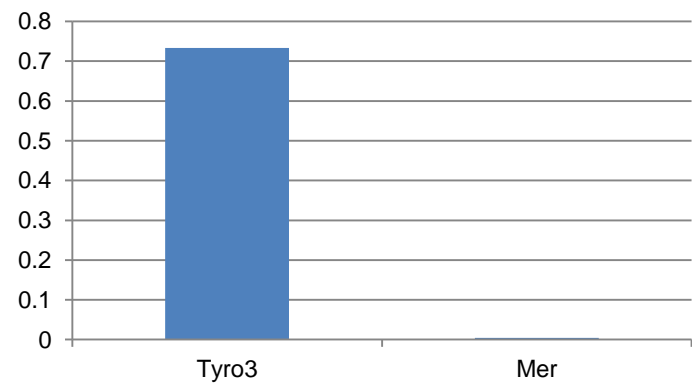

**pY221**

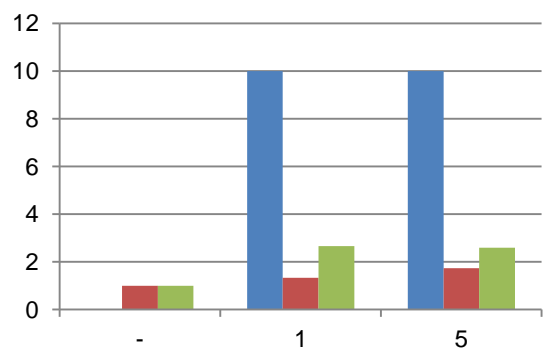

**pY221**

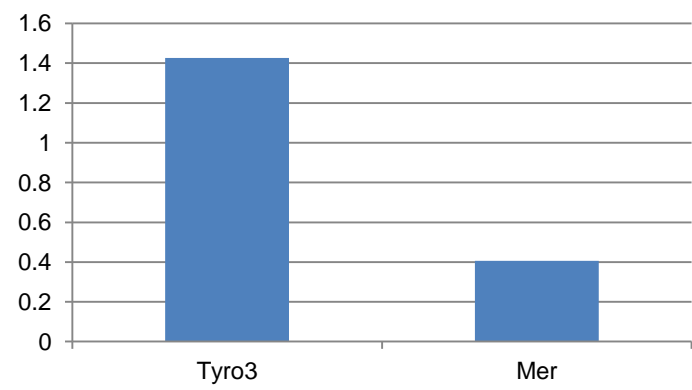

**pY239**

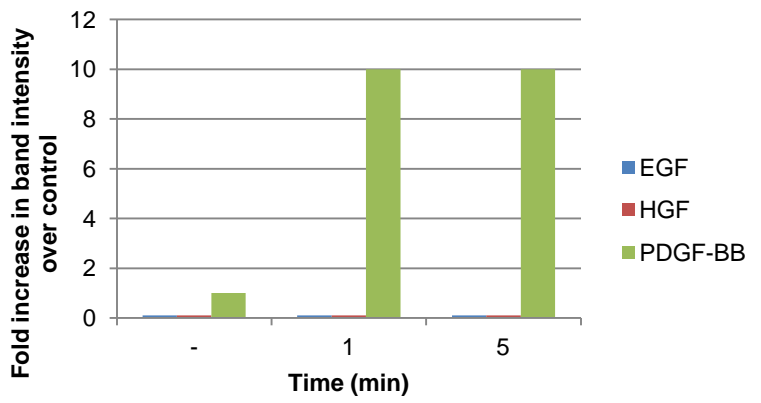

**pY239**

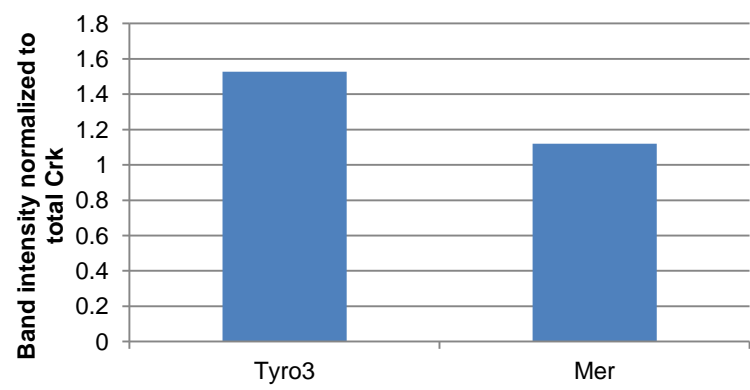

Supplement: NIHMS630501-supplement-2.pdf [file NIHMS630501-supplement-2.pdf]

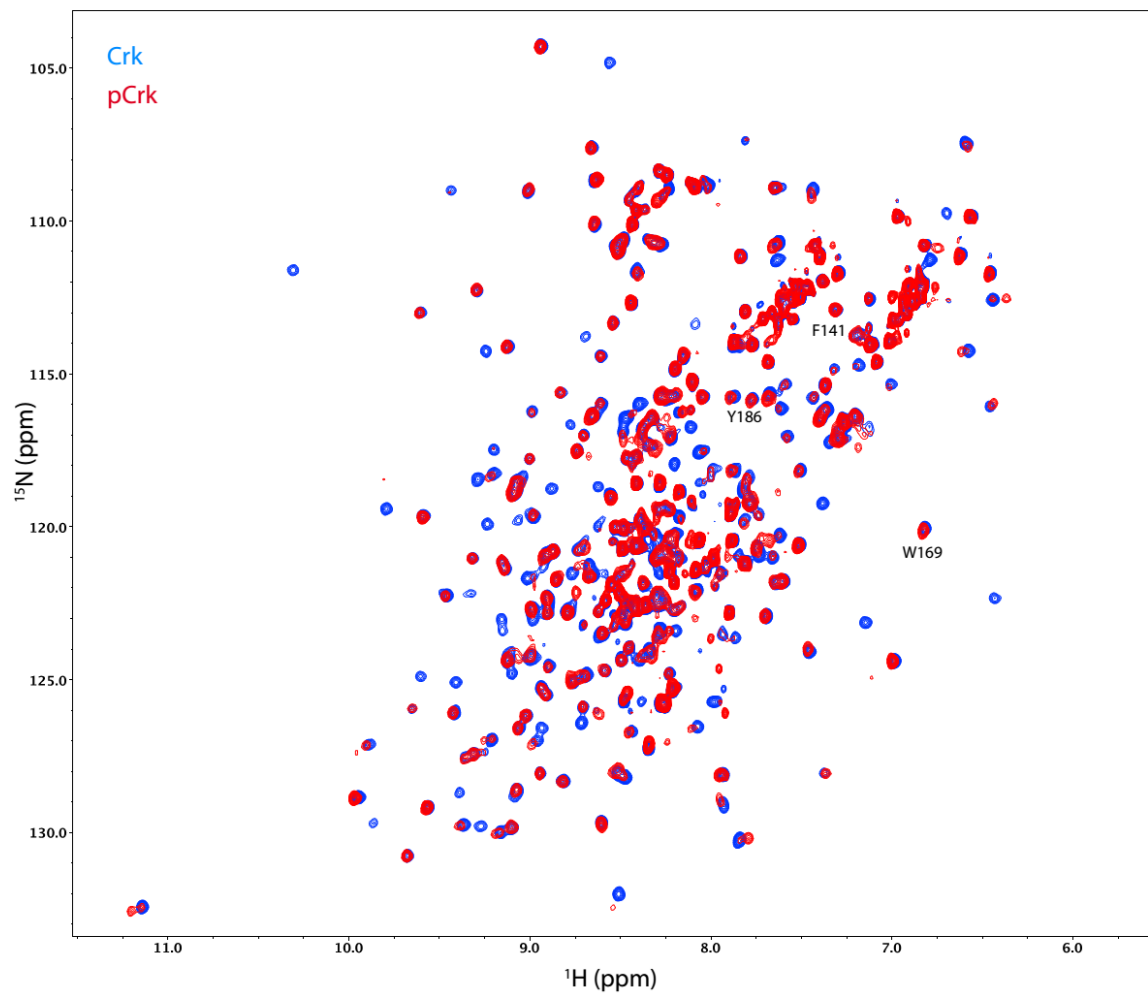

Supplement: NIHMS630501-supplement-3.pdf [file NIHMS630501-supplement-3.pdf]

**S3.****A.**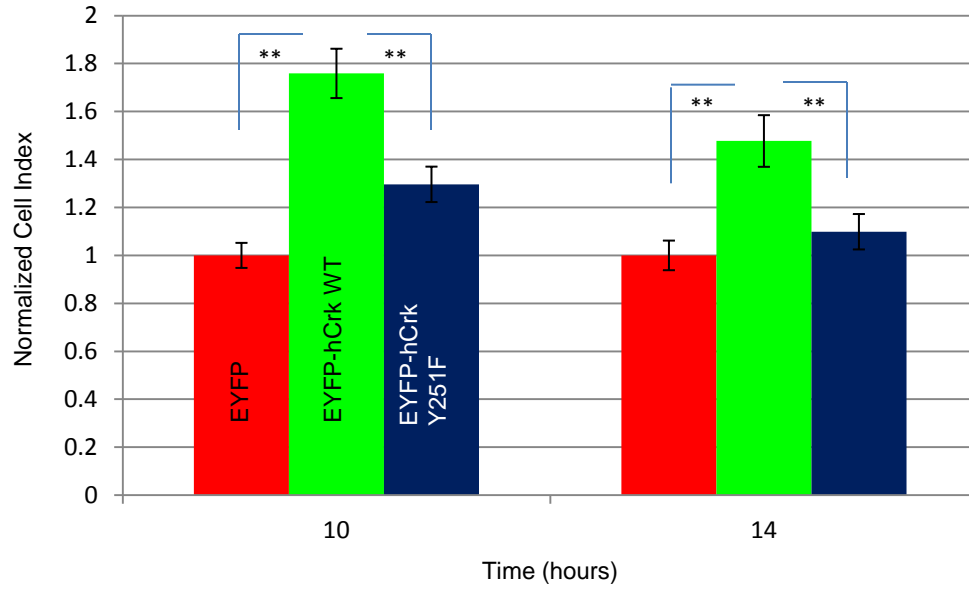**B.**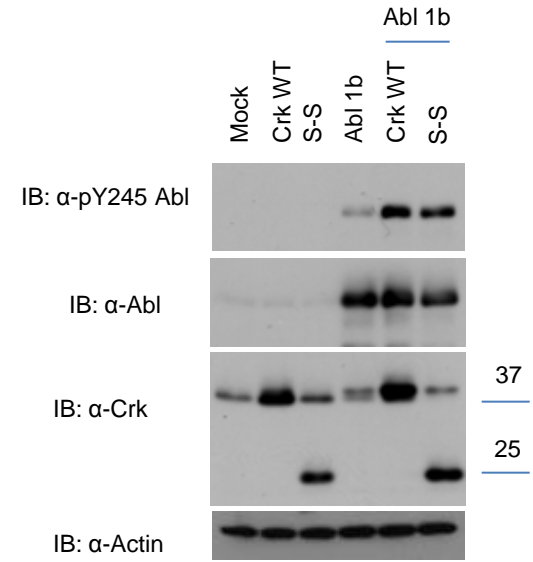

Supplement: NIHMS630501-supplement-4.pdf [file NIHMS630501-supplement-4.pdf]
